# Supplementary material
Source: PubMed Central journal article supplement (PMC3135264)
Supplement: NIHMS254848-supplement-1.pdf [file NIHMS254848-supplement-1.pdf]

## SUPPLEMENTARY DATA

**Figure S1. Tissue specific *Vhl* inactivation following Ad-Cre tail vein injection leads to fatty liver.** (A) PCR analysis of genomic DNA isolated from tissues of *Vhl*<sup>+/+</sup> and *Vhl*<sup>F/F</sup> animals at the indicated number of days post Ad-Cre injection; 1:1 mixture of unrecombined (*Vhl*<sup>F</sup>) and efficiently recombined (*Vhl*<sup>Frec</sup>) genomic DNA shown as a control. (B) Microscopic analysis of representative liver sections of animals of the indicated genotypes after Ad-Cre injection. H&E, hematoxylin eosin staining; ORO, Oil red O stained cryosections counterstained with hematoxylin; scale bar, 50μm.

**Table S1**

Carnitine and acylcarnitine levels in livers of nonfasted and 24 hours fasted animals sacrificed on day 4 after Ad-Cre injection. Values are mean  $\pm$  standard deviation and are presented as nmol/g of liver . \*  $p < 0.05$ , \*\*  $p < 0.01$  when compared to wild-type under the same conditions.

| <b>Nonfasted</b>         | <b><i>Vhl</i><sup>+/+</sup> (n = 7)</b> | <b><i>Vhl</i><sup>F/F</sup> (n = 7)</b> |
|--------------------------|-----------------------------------------|-----------------------------------------|
| Free carnitine           | 415.4 $\pm$ 83.4                        | 306.8 $\pm$ 39.9**                      |
| Acetylcarnitine (C2)     | 18.4 $\pm$ 22.2                         | 56 $\pm$ 25.1*                          |
| Propionylcarnitine (C3)  | 5.3 $\pm$ 3.2                           | 6.1 $\pm$ 1.8                           |
| Butyrylcarnitine (C4)    | 0.83 $\pm$ 0.59                         | 2.71 $\pm$ 1.38**                       |
| Isovalerylcarnitine (C5) | 0.86 $\pm$ 0.2                          | 0.61 $\pm$ 0.15*                        |
| Octanoylcarnitine (C8)   | 0.0019 $\pm$ 0.0005                     | 0.0029 $\pm$ 0.0013                     |
| Myristoylcarnitine (C14) | 0.0025 $\pm$ 0.0012                     | 0.0123 $\pm$ 0.0162                     |
| Palmitoylcarnitine (C16) | 0.044 $\pm$ 0.031                       | 0.192 $\pm$ 0.238                       |
| <b>Fasted</b>            | <b><i>Vhl</i><sup>+/+</sup> (n = 6)</b> | <b><i>Vhl</i><sup>F/F</sup> (n = 7)</b> |
| Free carnitine           | 622.3 $\pm$ 196.5                       | 366.1 $\pm$ 51.7**                      |
| Acetylcarnitine (C2)     | 10.1 $\pm$ 5                            | 26.2 $\pm$ 15.5*                        |
| Propionylcarnitine (C3)  | 3.4 $\pm$ 1.8                           | 3.8 $\pm$ 1.1                           |
| Butyrylcarnitine (C4)    | 0.61 $\pm$ 0.28                         | 1.49 $\pm$ 0.85*                        |
| Isovalerylcarnitine (C5) | 0.85 $\pm$ 0.45                         | 0.5 $\pm$ 0.15                          |
| Octanoylcarnitine (C8)   | 0.0017 $\pm$ 0.0007                     | 0.0035 $\pm$ 0.0014*                    |
| Myristoylcarnitine (C14) | 0.0168 $\pm$ 0.007                      | 0.0139 $\pm$ 0.0068                     |
| Palmitoylcarnitine (C16) | 0.146 $\pm$ 0.117                       | 0.156 $\pm$ 0.097                       |

## Table S2

Sequences of primers used in PCR analysis.

| Primer name | Sequence 5' → 3'           |
|-------------|----------------------------|
| Vhl F1      | TGCCTGGTACCCACGAAAGTGTC    |
| Vhl R1      | CTGACTTCCACTGATGCTTGTCACAG |
| Vhl F2      | CCGGAGTAGGATAAGTCAGCTGAG   |
| Hif1b F2    | TGCCAACATGTGCCACCATGT      |
| Hif1b R2    | GTGAGGCAGATTTCTTCCATGCTC   |
| Hif1b F4    | ACGCACTACAACACCTGAGCTAA    |

**Table S3**

Sequences of primers used in qRT-PCR analysis.

| Protein                                                          | Gene (MGI)      | Sequence 5'-3'                                       | Reference/Note                |
|------------------------------------------------------------------|-----------------|------------------------------------------------------|-------------------------------|
| Cyclophilin b                                                    | <i>Ppib</i>     | TGGAGAGCACCAAGACAGACA<br>TGCCGAGTCGACAATGAT          | [1]                           |
| Vascular endothelial growth factor                               | <i>Vegf</i>     | CACGACAGAAGGAGAGCAGAA<br>CGCTGGTAGACGTCCATGA         | Nguyen et al.,<br>unpublished |
| Glucose transporter 1                                            | <i>Glut1</i>    | GGTGTGCAGCAGCCTGTGTA<br>CAACAAACAGCGACACCACAGT       |                               |
| Glucose transporter 1                                            | <i>Glut1</i>    | CCTGCTCATCAATCGTAACGAGG<br>CGACCCTCTTCTTTCATCTCC     |                               |
| SREBP cleavage-activating protein                                | <i>SCAP</i>     | ATTGCTCACCGTGGAGATGTT<br>GAAGTCATCCAGGCCACTACTAATG   | [2]                           |
| Insulin induced gene 1                                           | <i>Insig-1</i>  | TCACAGTGACTGAGCTTCAGCA<br>TCATCTTCATCACACCAGGAC      | [3]                           |
| Insulin induced gene 2a                                          | <i>Insig-2a</i> | CCCTCAATGAATGTACTGAAGGATT<br>TGTGAAGTGAAGCAGACCAATGT | [3]                           |
| Insulin induced gene 2b                                          | <i>Insig-2b</i> | CCGGGCAGAGCTCAGGAT<br>GAAGCAGACCAATGTTCAATGG         | [3]                           |
| Sterol regulatory element binding protein 1a                     | <i>SREBP-1a</i> | GGCCGAGATGTGCGAACT<br>TTGTTGATGAGCTGGAGCATGT         | [2]                           |
| Sterol regulatory element binding protein 1c                     | <i>SREBP-1c</i> | GGAGCCATGGATTGCACATT<br>GGCCCGGAAGTCACTGT            | [2]                           |
| Sterol regulatory element binding protein 2                      | <i>SREBP-2</i>  | GCGTCTGGAGACCATGGA<br>ACAAAGTTGCTCTGAAAACAAATCA      | [2]                           |
| Farnesyl diphosphate synthase                                    | <i>Fpps</i>     | ATGGAGATGGGCGAGTTCCTC<br>CCGACCTTCCCGTCACA           | [2]                           |
| Squalene Synthase, Farnesyl diphosphate farnesyl transferase 1   | <i>Fdfl</i>     | CCAACTCAATGGGTCTGTTCCT<br>TGGCTTAGCAAAGTCTTCCAAC     | [2]                           |
| 3-hydroxy-3-methylglutaryl-Coenzyme A synthase 1                 | <i>Hmgcs1</i>   | GCCGTGAACTGGGTCGAA<br>GCATATATAGCAATGTCTCCTGCAA      | [2]                           |
| 3-hydroxy-3-methylglutaryl-Coenzyme A synthase 2 (mitochondrial) | <i>Hmgcs2</i>   | GACTTCCTGTCATCCAGC<br>GGTGTAGGTTTCTTCCAGC            |                               |
| 3-hydroxy-3-methylglutaryl-Coenzyme A reductase                  | <i>Hmgcr</i>    | CTGTGGAATGCCTTGTGATTG<br>AGCCGAAGCAGCACATGAT         | [2]                           |
| Low density lipoprotein receptor                                 | <i>Ldlr</i>     | AGGCTGTGGGCTCCATAGG<br>TGCGGTCCAGGGTCATCT            | [2]                           |
| Very low density lipoprotein receptor                            | <i>Vldlr</i>    | ACCTGTTCTGTCCCAATGG<br>TCACTGTAAGTCACAGGAGTTGAAGTAC  |                               |

|                                                                                    |               |                                                      |     |
|------------------------------------------------------------------------------------|---------------|------------------------------------------------------|-----|
| Peroxisome proliferator-activated receptor $\alpha$                                | <i>Ppara</i>  | ACAAGGCCTCAGGGTACCA<br>GCCGAAAGAAGCCCTTACAG          | [4] |
| Peroxisome proliferator-activated receptor $\alpha$                                | <i>Ppara</i>  | G TTCACGCATGTGAAGGCTGTAAG<br>CATTGTGTGACATCCCGACAGAC |     |
| Peroxisome proliferator-activated receptor $\delta$                                | <i>Ppard</i>  | ACGCACCCTTTGTCATCCA<br>TTCCACACCAGGCCCTTCT           |     |
| Peroxisome proliferator-activated receptor $\gamma$                                | <i>Pparg</i>  | CACAATGCCATCAGGTTTGG<br>GCTGGTCGATATCACTGGAGATC      | [4] |
| Liver X receptor $\alpha$                                                          | <i>Nr1h3</i>  | TCTGGAGACGTCACGGAGGTA<br>CCCGTTGTAAGTGAAGTCCTT       | [5] |
| Retinoid X receptor $\alpha$                                                       | <i>Rxra</i>   | CCTTACCAAGCACATCTG<br>TG TAGGTCAGGTCTTTGCG           |     |
| ATP-binding cassette protein A1                                                    | <i>Abca1</i>  | CGTTTCCGGAAGTGCCTA<br>GCTAGAGATGACAAGGAGGATGGA       | [1] |
| ATP-binding cassette protein G5                                                    | <i>Abcg5</i>  | TGGATCCAACACCTCTATGCTAAA<br>GGCAGGTTTTCTCGATGAACTG   | [1] |
| Cholesterol 7-a hydroxylase; Cytochrome P450, family 7, subfamily A, polypeptide 1 | <i>Cyp7a1</i> | AGCAACTAAACAACCTGCCAGTACTA<br>GTCCGGATATTCAAGGATGCA  | [1] |
| Malic enzyme                                                                       | <i>Mel1</i>   | GCCGGCTCTATCCTCCTTTG<br>TTTGTATGCATCTTGACAATCTTT     | [1] |
| Acyl-CoA synthetase short-chain family member 2                                    | <i>Acss2</i>  | GCTGCCGACGGGATCAG<br>TCCAGACACATTGAGCATGTCAT         | [1] |
| Acetyl-CoA carboxylase 1                                                           | <i>Acaca</i>  | TGGACAGACTGATCGCAGAGAAAAG<br>TGGAGAGCCCCACACACA      | [2] |
| Fatty Acid Synthase                                                                | <i>Fasn</i>   | GCTGCGGAAACTTCAGGAAAT<br>AGAGACGTGTCACCTCCTGGACTT    | [2] |
| Stearoyl CoA Desaturase 1                                                          | <i>Scd1</i>   | CCGAGACCCCTTAGATCGA<br>TAGCCTGTAAGATTTCTGCAAACC      | [2] |
| Glycerol-3-phosphate acyltransferase, mitochondrial                                | <i>Gpam</i>   | CAACACCATCCCCGACATC<br>GTGACCTTCGATTATGCGATCA        | [1] |
| Diacylglycerol acyltransferase 1                                                   | <i>Dgat1</i>  | GAGGCCTCTGCCCCTATG<br>GCCCTGGACAACACAGACT            | [6] |
| Diacylglycerol acyltransferase 2                                                   | <i>Dgat2</i>  | CCGCAAAGGCTTTGTGAAG<br>GGAATAAGTGGGAACCAGATCA        | [6] |
| Acyl glycerol-3-phosphate acyltransferase 1                                        | <i>Agpat1</i> | GCTGGCTGGCAGGAATCAT<br>GTCTGAGCCACCTCGGACAT          | [6] |
| Acyl glycerol-3-phosphate acyltransferase 2                                        | <i>Agpat2</i> | TTTGAGGTCAGCGGACAGAA<br>AGGATGCTCTGGTGATTAGAGATGA    | [6] |
| Acyl glycerol-3-phosphate acyltransferase 3                                        | <i>Agpat3</i> | CCAGTGGCTTCACAAGCTGTAC<br>CCCTGGGAATACACCCTTCTG      |     |
| Acyl glycerol-3-phosphate acyltransferase T4                                       | <i>Agpat4</i> | ACTTCGTGGAAATGATCTTTTGC<br>GAGGTGCAGCAGGCTCTTG       |     |

|                                                                                     |                 |                                                     |     |
|-------------------------------------------------------------------------------------|-----------------|-----------------------------------------------------|-----|
| Acyl-Coenzyme A oxidase 1, palmitoyl                                                | <i>Acox1</i>    | AGATTGGTAGAAATTGCTGCAAAA<br>ACGCCACTTCCTTGCTCTTC    |     |
| Cytochrome P450, family 4, subfamily a, polypeptide 14                              | <i>Cyp4a14</i>  | CCCCTCTAGATTTGCACCAGAT<br>TCCAATGCAGTTCCTTGATC      |     |
| Acetyl -CoA carboxylase 2                                                           | <i>Acacb</i>    | GGGCTCCCTGGATGACAAC<br>GCTCTTCCGGGAGGAGTTCT         | [7] |
| Carnitine palmitoyl transferase 1, liver isoform                                    | <i>Cpt1a</i>    | GACAGCTATGCCAAATCTCTGCTG<br>CAGGAATGCTCTGCGTTTATGCC |     |
| Carnitine palmitoyl transferase 2                                                   | <i>Cpt2</i>     | AGCCTACCTGGTCAATGCATATC<br>GGGTTGGGTATACGAGTTGAATT  |     |
| Medium-chain specific acyl-CoA dehydrogenase (Mcad)                                 | <i>Acadm</i>    | GCAACTGCCCGCAAGTTT<br>TACTCCCCGCTTTTGTTCATATTC      |     |
| Long-chain specific acyl-CoA dehydrogenase (Lcad)                                   | <i>Acadl</i>    | TCAATGGAAGCAAGGTGTTC<br>GCCACGACGATCACGAGAT         |     |
| Microsomal triglyceride transfer protein                                            | <i>Mttp</i>     | CCTACCAGGCCCAACAAGAC<br>CGCTCAATTTTGCATGTATCC       | [4] |
| Adipophilin                                                                         | <i>Adfp</i>     | ATGAGTCCCCTGTGTTGAG<br>GCCTGATCTTGAATGTTCTGTG       |     |
| Phosphoenolpyruvate carboxykinase, cytosolic                                        | <i>Pck1</i>     | GTGCTGGAGTGGATGTTCGG<br>CTGGCTGATTCTCTGTTTCAGG      | [8] |
| Glucose 6 phosphatase                                                               | <i>G6pc</i>     | ACTGTGGGCATCAATCTCCTC<br>CGGGACAGACAGACGTTTCAGC     | [8] |
| Peroxisome proliferative activated receptor, gamma, coactivator 1 (PGC-1 $\alpha$ ) | <i>Ppargc1a</i> | AACCACACCCACAGGATCAGA<br>TCTTCGCTTTATTGCTCCATGA     | [4] |
| Pyruvate dehydrogenase kinase                                                       | <i>Pdk1</i>     | GTGTTTGCTGAAGCTCCTAAAGG<br>TGTTCAAAACCACGCCCAAT     |     |

## Supplementary References

1. Liang, G., Yang, J., Horton, J., Hammer, R., Goldstein, J., and Brown, M. (2002). Diminished hepatic response to fasting/refeeding and liver X receptor agonists in mice with selective deficiency of sterol regulatory element-binding protein-1c. *J Biol Chem* 277, 9520-9528.
2. Yang, J., Goldstein, J., Hammer, R., Moon, Y., Brown, M., and Horton, J. (2001). Decreased lipid synthesis in livers of mice with disrupted Site-1 protease gene. *Proc Natl Acad Sci U S A* 98, 13607-13612.
3. Yabe, D., Komuro, R., Liang, G., Goldstein, J., and Brown, M. (2003). Liver-specific mRNA for Insig-2 down-regulated by insulin: implications for fatty acid synthesis. *Proc Natl Acad Sci U S A* 100, 3155-3160.
4. Chung, S., Timmins, J., Duong, M., Degirolamo, C., Rong, S., Sawyer, J., Singaraja, R., Hayden, M., Maeda, N., Rudel, L., et al. (2010). Targeted deletion of hepatocyte ABCA1 leads to very low density lipoprotein triglyceride overproduction and low density lipoprotein hypercatabolism. *J Biol Chem* 285, 12197-12209.
5. Wang, M., Chen, L., Clark, G., Lee, Y., Stevens, R., Ilkayeva, O., Wenner, B., Bain, J., Charron, M., Newgard, C., et al. (2010). Leptin therapy in insulin-deficient type I diabetes. *Proc Natl Acad Sci U S A* 107, 4813-4819.
6. Moon, Y., Hammer, R., and Horton, J. (2009). Deletion of ELOVL5 leads to fatty liver through activation of SREBP-1c in mice. *J Lipid Res* 50, 412-423.

7. Okazaki, H., Goldstein, J., Brown, M., and Liang, G. (2010). LXR-SREBP-1c-phospholipid transfer protein axis controls very low density lipoprotein (VLDL) particle size. *J Biol Chem* *285*, 6801-6810.
8. Foretz, M., Ancellin, N., Andreelli, F., Saintillan, Y., Grondin, P., Kahn, A., Thorens, B., Vaulont, S., and Viollet, B. (2005). Short-term overexpression of a constitutively active form of AMP-activated protein kinase in the liver leads to mild hypoglycemia and fatty liver. *Diabetes* *54*, 1331-1339.
